# Supplementary material for: Hepatoma-Derived Growth Factor-Related Protein-3 Is a Novel Angiogenic Factor
Source: PubMed Central journal article supplement (PMC4440747; doi:10.1371/journal.pone.0127904), 2015-05-21
Supplement: pone.0127904.s002.pdf [file pone.0127904.s002.pdf]

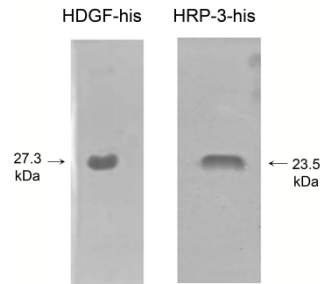

**S2 Fig. Purified HRP-3 and HDGF.** Recombinant HRP-3 and HDGF were expressed as bacteria with a C-terminal polyhistidine tag, purified using cobalt columns and analyzed by SDS-PAGE with Commassie blue staining.
