# Supplementary material for: Hepatoma-Derived Growth Factor-Related Protein-3 Is a Novel Angiogenic Factor
Source: PubMed Central journal article supplement (PMC4440747; doi:10.1371/journal.pone.0127904), 2015-05-21
Supplement: pone.0127904.s003.pdf [file pone.0127904.s003.pdf]

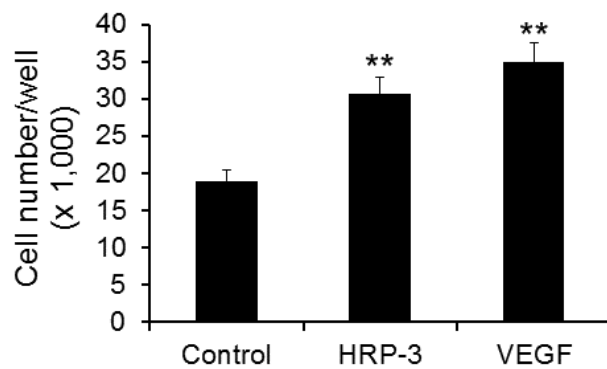

**S3 Fig. HRP-3 enhances the growth of HAECs.** The proliferation assay with HAECs was performed as in Figure 2. HRP-3 (500 ng/ml), VEGF (50 ng/ml) or PBS was incubated with HAECs for 48 h. Total number of cells in each well was quantified and compared (n=8). Data are mean  $\pm$  s.e.m., t-test, \*\* $P$ <0.01, vs. control.
