# Supplementary material for: Hepatoma-Derived Growth Factor-Related Protein-3 Is a Novel Angiogenic Factor
Source: PubMed Central journal article supplement (PMC4440747; doi:10.1371/journal.pone.0127904), 2015-05-21
Supplement: pone.0127904.s004.pdf [file pone.0127904.s004.pdf]

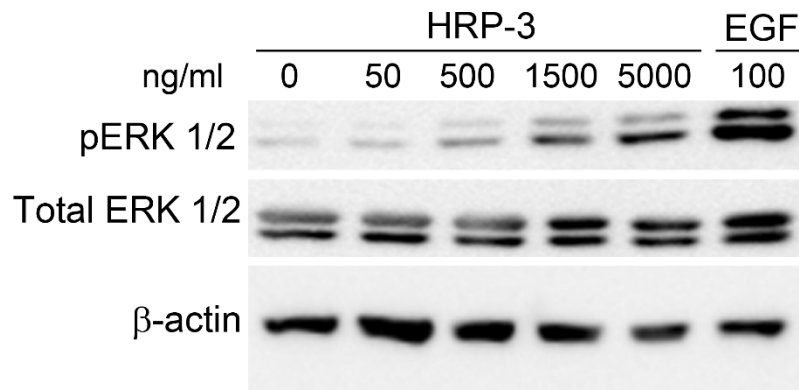

**S4 Fig. HRP-3 activates ERK signaling pathway in HAECs.** The experimental procedure is the same as to HUVECs in Fig. 4C. Briefly, HAECs were incubated in serum-free medium for 15 min x 3 times, then incubated with HRP-3 or EGF for 10 min. Cells were lysed and analyzed by Western blot using antibodies against phospho-ERK (pERK), ERK or β-actin.
