# Supplementary material for: Hepatoma-Derived Growth Factor-Related Protein-3 Is a Novel Angiogenic Factor
Source: PubMed Central journal article supplement (PMC4440747; doi:10.1371/journal.pone.0127904), 2015-05-21
Supplement: pone.0127904.s005.pdf [file pone.0127904.s005.pdf]

**S1 Table. Criteria for grading the severity of corneal neovascularization**

| <b>Score</b> | <b>Number of Quadrants with corneal neovascularization</b> | <b>Number of corneal vessels / quadrant</b> | <b>Length of longest corneal vessel between limbus and cornea center / quadrant</b> | <b>Number of branch points / quadrant</b> |
|--------------|------------------------------------------------------------|---------------------------------------------|-------------------------------------------------------------------------------------|-------------------------------------------|
| 1            | 1                                                          | 1-5                                         | 0.05-0.25                                                                           | 1-5                                       |
| 2            | 2                                                          | 6-10                                        | 0.26-0.50                                                                           | 6-10                                      |
| 3            | 3                                                          | 11-15                                       | 0.51-0.75                                                                           | 11-15                                     |
| 4            | 4                                                          | >15                                         | >0.75                                                                               | 16+                                       |

**Note.** Cornea neovascularization was assessed using a modified scoring system. A score of 0-4 was assigned for number, length and branch points for new cornea vessels, as indicated in the table above. The total score for each mouse was used as an indicator for corneal angiogenesis.
